# Supplementary material for: Effects of Chronic Kidney Disease on Nanomechanics of the Endothelial Glycocalyx Are Mediated by the Mineralocorticoid Receptor
Source: MDPI journal article supplement (doi:10.3390/ijms231810659), 2022-09-13
Supplement: s1 [file s1]

**Supplemental Table S1: Patient Characteristics (4C Study)** Sera obtained at the baseline visit of 25 patients were used and patient characteristics are listed. The estimated glomerular filtration rate (mL/min/1.73 m<sup>2</sup>) of these patients was 41.3 in patients (n=10) with stage 3, 17.5 in patients (n=8) with stage 4, and 12.6 in patients (n=7) with stage 5 CKD (all pre-dialysis). Abbreviations: SDS= standard deviation score, eGFR= estimated glomerular filtration rate, cIMT= carotid intima-media thickness, PWV= pulse wave velocity, IS= indoxyl-sulfate, PCS= p-cresyl-sulfate, Angpt= Angiopoietin.<sup>^</sup>

|                                    | CKD G3<br>n= 10 | CKD G4<br>n= 8 | CKD G5<br>n= 7 |
|------------------------------------|-----------------|----------------|----------------|
| Age (years)                        | 13 ± 2.5        | 13 ± 3.6       | 13 ± 2.6       |
| Height SDS                         | -0.1 ± 1.8      | -1.6 ± 0.88    | -1.3 ± 1.2     |
| BMI SDS                            | 0.081 ± 1.4     | - 0.06 ± 1.5   | -0.06 ± 0.87   |
| eGFR (mL/min/1.73 m <sup>2</sup> ) | 41.3 ± 10       | 17.5 ± 1.8     | 12.6 ± 2.2     |
| cIMT SDS                           | 2.1 ± 2.0       | 2.1 ± 0.87     | 2.5 ± 2.7      |
| PWV SDS                            | 0.05 ± 1.7      | 0.16 ± 1.3     | 0.94 ± 1.4     |
| Log IS (μmol/l)                    | 0.87 ± 1.1      | 2.3 ± 1.3      | 2.7 ± 0.8      |
| Log PCS (μmol/l)                   | 2.3 ± 0.87      | 2.7 ± 0.91     | 3.4 ± 0.67     |
| Angpt 1 (pg/mL)                    | 39286 ± 10921   | 32749 ± 12500  | 49891 ± 25702  |
| Angpt 2 (pg/mL)                    | 3442 ± 1469     | 4956 ± 3307    | 6880 ± 5505    |
